# Supplementary material
Source: PubMed Central journal article supplement (PMC7849671)
Supplement: jcsm.8376.ds001.pdf [file jcsm.8376.ds001.pdf]

**Table S1. Baseline Demographic Details of Participants (whole recruited sample)**

|                                           |                     | Saffron  | Placebo  | p-value           |
|-------------------------------------------|---------------------|----------|----------|-------------------|
|                                           |                     | n=33     | n=30     |                   |
| Age                                       | Mean                | 48.79    | 51.10    | .354 <sup>a</sup> |
|                                           | SE                  | 1.87     | 1.59     |                   |
| BMI                                       | Mean                | 24.97    | 25.55    | .541 <sup>a</sup> |
|                                           | SE                  | 0.69     | 0.62     |                   |
| Gender (n)                                | Male                | 5 (15%)  | 5 (17%)  | .869 <sup>b</sup> |
|                                           | Female              | 28 (85%) | 25 (83%) |                   |
| Marital Status (n)                        | Single              | 30 (91%) | 25 (83%) | .367 <sup>b</sup> |
|                                           | Married             | 3 (9%)   | 5 (17%)  |                   |
| Educational Level (n)                     | Secondary           | 12 (36%) | 8 (27%)  | .633 <sup>b</sup> |
|                                           | Tertiary            | 17 (51%) | 19 (63%) |                   |
|                                           | Post-graduate       | 4 (12%)  | 3 (10%)  |                   |
| Exercise Level (n)                        | Never/Rarely        | 11 (33%) | 16 (53%) | .157 <sup>b</sup> |
|                                           | 1 to 2 times a week | 15 (45%) | 7 (23%)  |                   |
|                                           | 3 to 5 times a week | 7 (21%)  | 7 (23%)  |                   |
| Duration of sleep problems (n)            | < 6 months          | 6 (18%)  | 1 (3%)   | .312 <sup>a</sup> |
|                                           | 6 to 12 months      | 3 (9%)   | 3 (10%)  |                   |
|                                           | 1-2 years           | 10 (30%) | 10 (33%) |                   |
|                                           | 2+ years            | 14 (42%) | 16 (53%) |                   |
| ISI                                       | Mean                | 15.73    | 14.57    | .197 <sup>a</sup> |
|                                           | SE                  | 0.61     | 0.65     |                   |
| DBAS                                      | Mean                | 75.27    | 80.03    | .465 <sup>a</sup> |
|                                           | SE                  | 3.54     | 5.57     |                   |
| DASS-21 - Depression                      | Mean                | 4.73     | 3.20     | .312 <sup>a</sup> |
|                                           | SE                  | 1.13     | 0.95     |                   |
| DASS-21- Anxiety                          | Mean                | 3.58     | 2.93     | .540 <sup>a</sup> |
|                                           | SE                  | 0.71     | 0.77     |                   |
| DASS-21- Stress                           | Mean                | 9.15     | 8.27     | .556 <sup>a</sup> |
|                                           | SE                  | 1.10     | 1.00     |                   |
| DASS-21- Total                            | Mean                | 17.45    | 14.40    | .356 <sup>a</sup> |
|                                           | SE                  | 2.43     | 2.17     |                   |
|                                           |                     | n=28     | n=27     |                   |
| PSD - Total sleep time (hrs)              | Mean                | 7.33     | 6.92     | .307 <sup>a</sup> |
|                                           | SE                  | 0.28     | 0.28     |                   |
| PSD - Sleep latency (min)                 | Mean                | 39.38    | 32.61    | .444 <sup>a</sup> |
|                                           | SE                  | 7.16     | 4.97     |                   |
| PSD - Number of wakings after sleep onset | Mean                | 3.23     | 3.15     | .826 <sup>a</sup> |
|                                           | SE                  | 0.26     | 0.28     |                   |
| PSD - Sleep quality                       | Mean                | 2.46     | 2.78     | .120 <sup>a</sup> |
|                                           | SE                  | 0.11     | 0.16     |                   |
| PSD - Mood on awakening                   | Mean                | 2.88     | 2.72     | .435 <sup>a</sup> |
|                                           | SE                  | 0.11     | 0.16     |                   |
| PSD - Alertness on awakening              | Mean                | 2.77     | 3.02     | .254 <sup>a</sup> |
|                                           | SE                  | 0.14     | 0.17     |                   |
| RSQ                                       | Mean                | 46.73    | 52.93    | .154 <sup>a</sup> |
|                                           | SE                  | 2.46     | 3.54     |                   |

a = Independent samples t-test; b = Chi-square Test; BMI = Body Mass Index; SE=standard error; DBAS = Dysfunctional Beliefs About Sleep; DASS = Depression, Anxiety, Stress Scale; ISI = Insomnia Severity Index; RSQ = Restorative Sleep Questionnaire; PSD = Pittsburgh Sleep Diary.
